# Supplementary material for: Manipulation of Majorana bound states in proximity to a quantum ring with Rashba coupling
Source: PubMed Central journal article supplement (PMC8776818; doi:10.1038/s41598-022-05043-y), 2022-01-20
Supplement: 41598_2022_5043_MOESM1_ESM.pdf [file 41598_2022_5043_MOESM1_ESM.pdf]

# Supplemental Material: Manipulation of Majorana bound states in proximity to a quantum ring with Rashba coupling

Fabián Gonzalo Medina<sup>1,+,\*</sup>, Dunkan Martínez<sup>2,+</sup>, Álvaro Díaz-Fernández<sup>3</sup>, Francisco Domínguez-Adame<sup>2</sup>, Luis Rosales<sup>1</sup>, and Pedro A. Orellana<sup>1</sup>

<sup>1</sup>Departamento de Física, Universidad Técnica Federico Santa María, Casilla 110 V,  
Valparaíso, Chile

<sup>2</sup>GISC, Departamento de Física de Materiales, Universidad Complutense, E-28040  
Madrid, Spain

<sup>3</sup>GISC, GSC, Departamento de Estructuras y Física de Edificación, Universidad  
Politécnica de Madrid, E-28031 Madrid, Spain

\*fmmedinacfabian@gmail.com

+These authors contributed equally to this work

## Quasiparticle spectra, Charge and Spin Currents For $N = 5, 6$ .

The spectra and currents for  $N = 5, 6$  are presented.

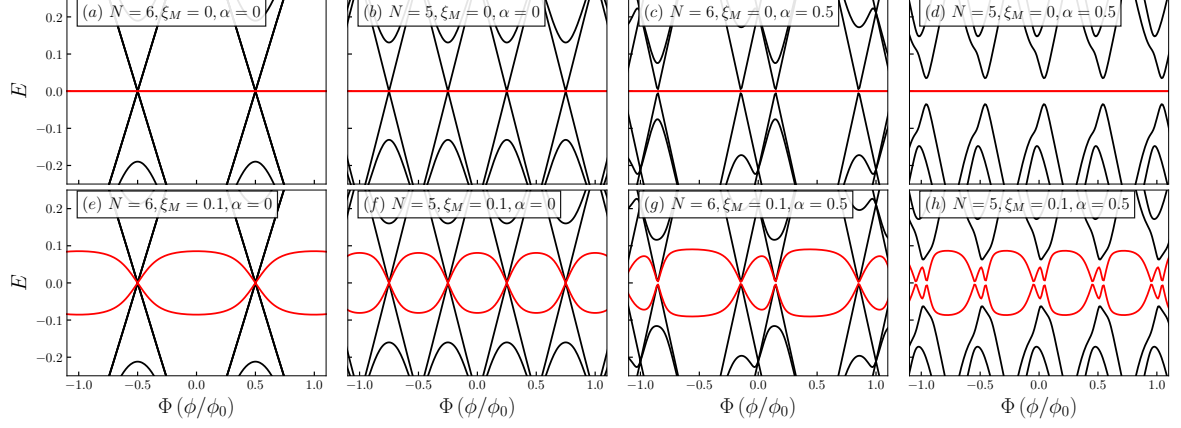

Figure 1: Quasiparticle spectra for  $\lambda_1 = 0.1$  and  $\lambda_2 = 0$ . The number of sites,  $N$ , the coupling between MZMs,  $\xi_M$ , and the Rashba spin-orbit coupling,  $\alpha$ , are indicated in the figure. Black curves represent the states in the quantum ring and the red curves correspond to the Majorana modes.

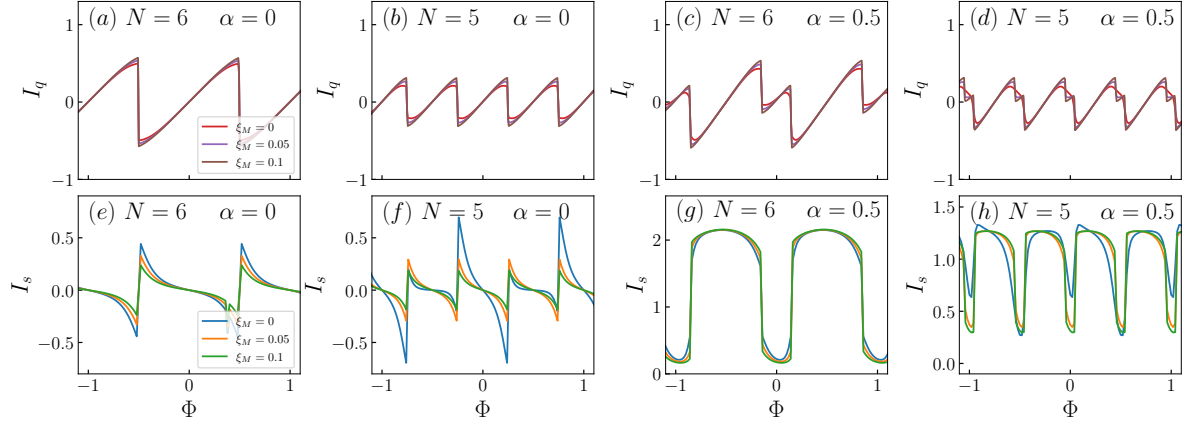

Figure 2: Charge and spin persistent currents,  $I_q$  and  $I_s$  respectively, for  $\lambda_1 = 0.1, \lambda_2 = 0$ . The number of sites,  $N$ , and the Rashba spin-orbit coupling,  $\alpha$ , are indicated in the figures. The coupling between MZMs,  $\xi_M$ , is indicated by coloured lines, shown in the leftmost panels.

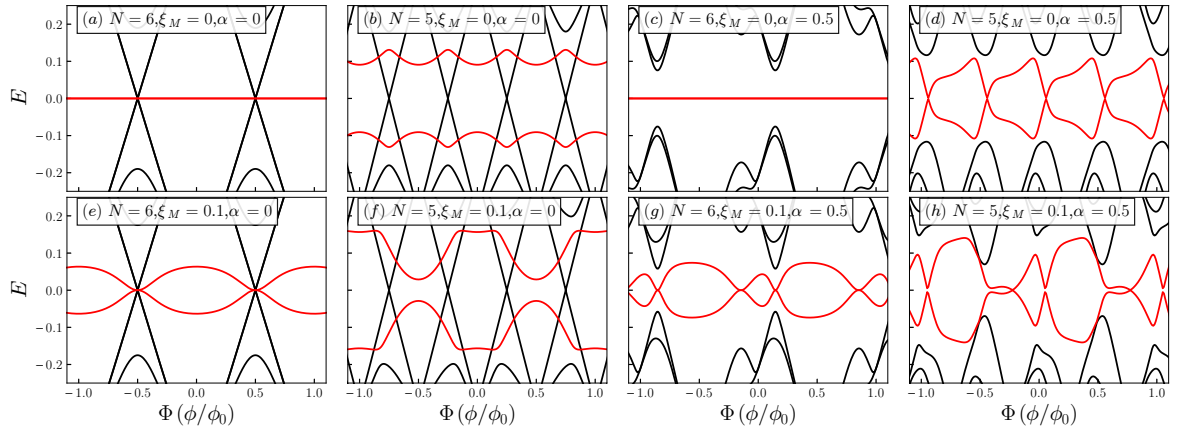

Figure 3: Quasiparticle spectra for  $\lambda_1 = 0.1$  and  $\lambda_2 = 0.15$ . The number of sites,  $N$ , the coupling between MZMs,  $\xi_M$ , and the Rashba spin-orbit coupling,  $\alpha$ , are indicated in the figure. Black curves represent the states in the quantum ring and the red curves correspond to the Majorana modes.

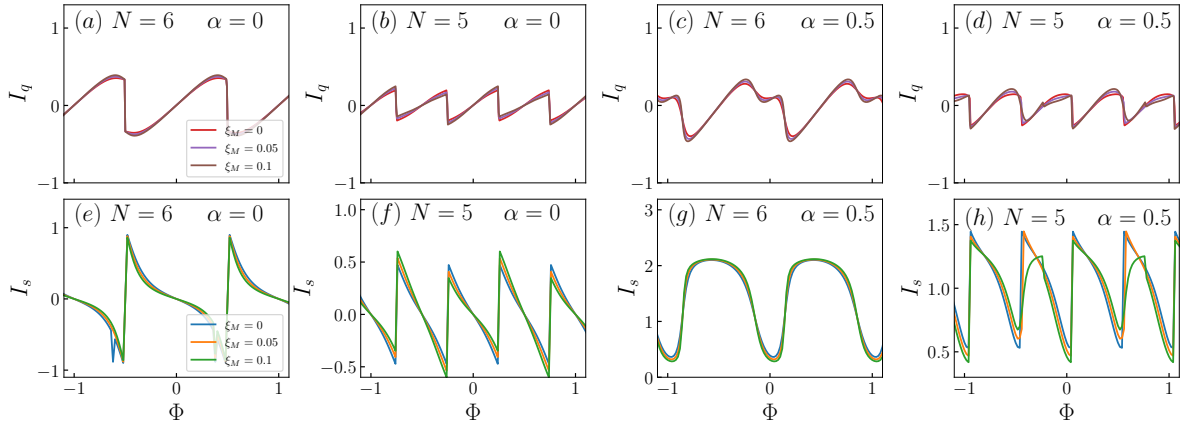

Figure 4: Charge and spin persistent currents,  $I_q$  and  $I_s$  respectively, for  $\lambda_1 = 0.1, \lambda_2 = 0.15$ . The number of sites,  $N$ , and the Rashba spin-orbit coupling,  $\alpha$ , are indicated in the figures. The coupling between MZMs,  $\xi_M$ , is indicated by coloured lines, shown in the leftmost panels.

The spectra obtained for  $N = 5$  show avoiding crossings between Majorana modes in panel (b) and (f) from Figure 3. In the spectra for  $N = 3$  Majorana modes display zero energy crossing around  $0.5$  and  $-0.5$ , as we mention before, this does not happen for  $N > 5$  as can be observed in panel (f) from Figure 6.

## Quasiparticle Spectra for $N = 11, 12$ .

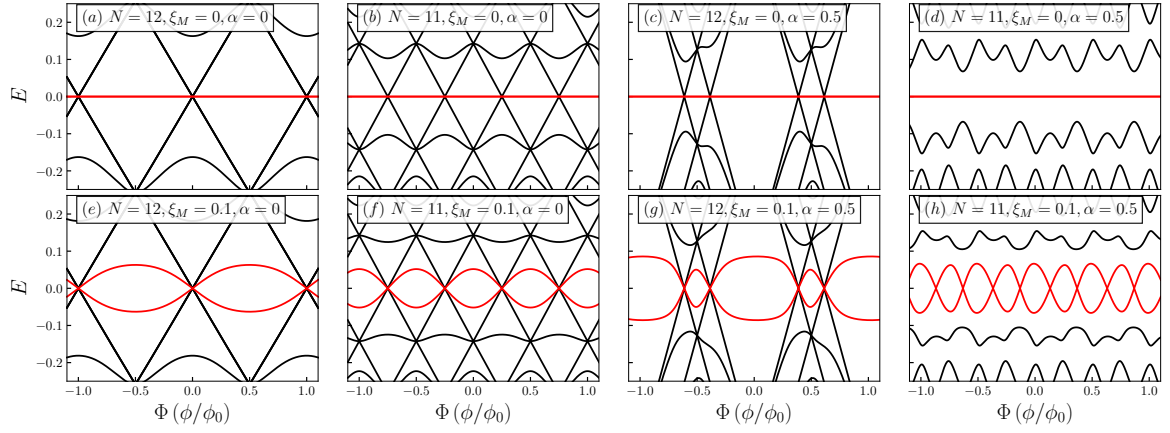

Figure 5: Quasiparticle spectra for  $\lambda_1 = 0.1$  and  $\lambda_2 = 0$ . The number of sites,  $N$ , the coupling between MZMs,  $\xi_M$ , and the Rashba spin-orbit coupling,  $\alpha$ , are indicated in the figure. Black curves represent the states in the quantum ring and the red curves correspond to the Majorana modes.

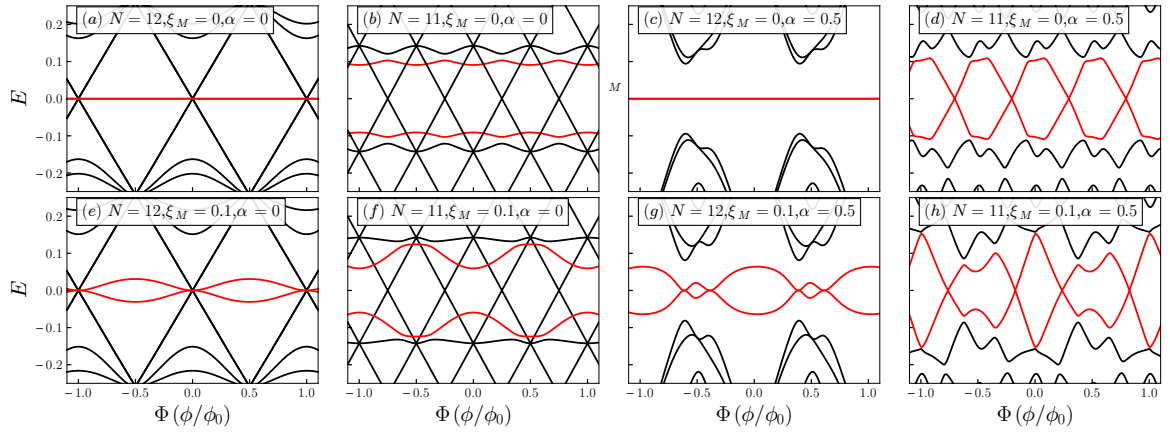

Figure 6: Quasiparticle spectra for  $\lambda_1 = 0.1$  and  $\lambda_2 = 0.15$ . The number of sites,  $N$ , the coupling between MZMs,  $\xi_M$ , and the Rashba spin-orbit coupling,  $\alpha$ , are indicated in the figure. Black curves represent the states in the quantum ring and the red curves correspond to the Majorana modes.
